# Supplementary material
Source: PubMed Central journal article supplement (PMC2981530)
Supplement: blood-2010-06-292268_1.pdf [file blood-2010-06-292268_1.pdf]

| <b>LMP2 assay</b>     | <b>Primer/probe combination</b> | <b>Oligonucleotide sequence (5'-3')</b> | <b>EBV genome coordinates†</b> |
|-----------------------|---------------------------------|-----------------------------------------|--------------------------------|
| LMP2A<br>conventional | F LMP2A                         | CGGGATGACTCATCTCAACACATA                | 166412–35                      |
|                       | R LMP2                          | GGCGGTCAACAACGGTACTAACT                 | 163–142                        |
|                       | LMP2 probe                      | CAGTATGCCTGCCTGTAATTGTTGCGC             | 66–92                          |
| LMP2B<br>conventional | F LMP2B                         | CGGGAGGCCGTGCTTTA                       | 169421–37                      |
|                       | R LMP2                          | GGCGGTCAACAACGGTACTAACT                 | 163–142                        |
|                       | LMP2 probe                      | CAGTATGCCTGCCTGTAATTGTTGCGC             | 66–92                          |
| Exon 2                | F2 primer                       | CTGTAATTGTTGCGCCCTACCT                  | 78–99                          |
|                       | R2 primer                       | TGCTGCCAAGAGTAGAAGTGAGA                 | 199–177                        |
|                       | Exon 2 probe                    | CTATTGCCGCCTCGTGTTTCACGG                | 114–137                        |
| TR-LMP2               | TR-F primer                     | ACTTTTCTTCTTGCCCGTTCTCT                 | 28–50                          |
|                       | TR-R primer                     | GAAACACGAGGCGGCAATAG                    | 133–114                        |
|                       | TR exon 2 probe                 | CAGTATGCCTGCCTGTAATTGTTGCGC             | 66–92                          |
| Exon 6                | F5-6 primer (exon5/6 junction)  | TGGACACTTGTGGTTCTCCTGAT                 | 942–951/1026–1038              |
|                       | F6 primer                       | GGTTCTCCTGATTTGCTCTTCGT                 | 1027–1049                      |
|                       | R6 primer                       | CGCGGAGGCTAGCAACA                       | 1129–1113                      |
|                       | Exon 6 probe                    | TCCTTCTGGCAGACTGTTCTATATGCTC            | 1074–1103                      |

†Location of primer and probe sequences based on EBV genome sequence accession number NC007605.
